# Supplementary material for: „Wir wollen mitreden!“ – Entwicklung und Validierung von Skalen zur Erfassung motivationaler Regulation bei der Teilnahme an Befragungen zur Evaluation des Studiums (SMR-Eval)
Source: Atypon-hosted journal article supplement (doi:10.1024/1010-0652/a000381), 2024-04-18
Supplement: 1010-0652_a000381_esm1.pdf [file 1010-0652_a000381_esm1.pdf]

**Elektronisches Supplement (ESM) 1 zu:**

„Wir wollen mitreden!“ – Entwicklung und Validierung von Skalen zur Erfassung motivationaler Regulation bei der Teilnahme an Befragungen zur Evaluation des Studiums (SMR-Eval)

**Tabelle E1.** Anzahl der Teilnehmenden und Angaben zum Geschlecht je Studiengang der Gesamtstichprobe  $N_I = 1,887$  in Studie 1 (bestehend aus den Teilstichproben  $N_{Ia}$ ,  $N_{Ib}$  und  $N_{Ic}$ )

| (Teil-)Studiengang und Abschlussgrad                   | $N$ | $N_{gesamt}$ |          |        |
|--------------------------------------------------------|-----|--------------|----------|--------|
|                                                        |     | weiblich     | männlich | divers |
| <i>Biologie</i>                                        |     |              |          |        |
| Biological Sciences B.Sc.                              | 67  | 74.6 %       | 25.4 %   |        |
| <i>Rechtswissenschaften</i>                            |     |              |          |        |
| Deutsch-französische Rechtswissenschaften LL.B.        | 79  | 73.4 %       | 25.3 %   | 1.3 %  |
| Deutsch-italienische Rechtswissenschaften LL.B.        | 30  | 73.3 %       | 26.7 %   |        |
| Deutsch-türkische Rechtswissenschaften LL.B.           | 47  | 87.2 %       | 10.6 %   | 2.1 %  |
| Jura Staatsexamen                                      | 830 | 73.7 %       | 26.3 %   |        |
| Wirtschaftsrecht LL.M.                                 | 40  | 57.5 %       | 42.5 %   |        |
| <i>Philosophie</i>                                     |     |              |          |        |
| Philosophie M.A. (1-Fach und 2-Fach)                   | 14  | 64.3 %       | 35.7 %   |        |
| Philosophie B.A. (2-Fach)                              | 55  | 58.2 %       | 41.8 %   |        |
| Philosophie B.A. Lehramtsprofile GyGes und HRSG        | 73  | 65.6 %       | 32.9 %   | 1.3 %  |
| Philosophie M.Ed. Lehramtsprofile GyGes und HRSG       | 19  | 73.7 %       | 26.3 %   |        |
| Gender & Queer Studies M.A.                            | 33  | 75.8 %       | 15.2 %   | 9.1 %  |
| <i>Pädagogik</i>                                       |     |              |          |        |
| Erziehungswissenschaften M.A. (2-Fach)                 | 24  | 87.5 %       | 12.5 %   |        |
| Bildung in der frühen Kindheit M.A. (2-Fach)           | 16  | 100.0 %      |          |        |
| Erwachsenenbildung M.A. (2-Fach)                       | 24  | 87.5 %       | 12.5 %   |        |
| Erziehungswissenschaften B.A. (1-Fach)                 | 146 | 92.5 %       | 6.8 %    | 0.7 %  |
| Erziehungswissenschaften B.A. (2-Fach)                 | 85  | 91.8 %       | 8.2 %    |        |
| Frühförderung B.A.                                     | 81  | 96.3 %       | 3.7 %    |        |
| Interkulturelle Bildung M.A. (1-Fach)                  | 39  | 87.2 %       | 12.8 %   |        |
| Interkulturelle Bildung M.A. (2-Fach)                  | 18  | 94.4 %       | 5.6 %    |        |
| Pädagogik B.A. Lehramtsprofil GyGes                    | 60  | 88.3 %       | 11.7 %   |        |
| Pädagogik M.E. Lehramtsprofil GyGes                    | 37  | 89.2 %       | 10.8 %   |        |
| <i>Keine Angabe zu Studiengang und/oder Geschlecht</i> | 71  |              |          |        |

Anmerkung: GyGes = Gymnasien und Gesamtschulen; HRSG = Haupt-, Real, Sekundär- und Gesamtschulen; LL.B. = Bachelor of Laws

**Abbildung E1.** Messmodelle der KFA für ein (a) 6-Faktoren-Modell, (b) 5-Faktoren-Modell und (c) 2-Faktoren-Modell. Nicht dargestellt ist das Modell mit einem Faktor, auf dem alle Items laden. Aus Gründen der Übersichtlichkeit werden Residuen sowie Korrelationen zwischen Faktoren nicht dargestellt.

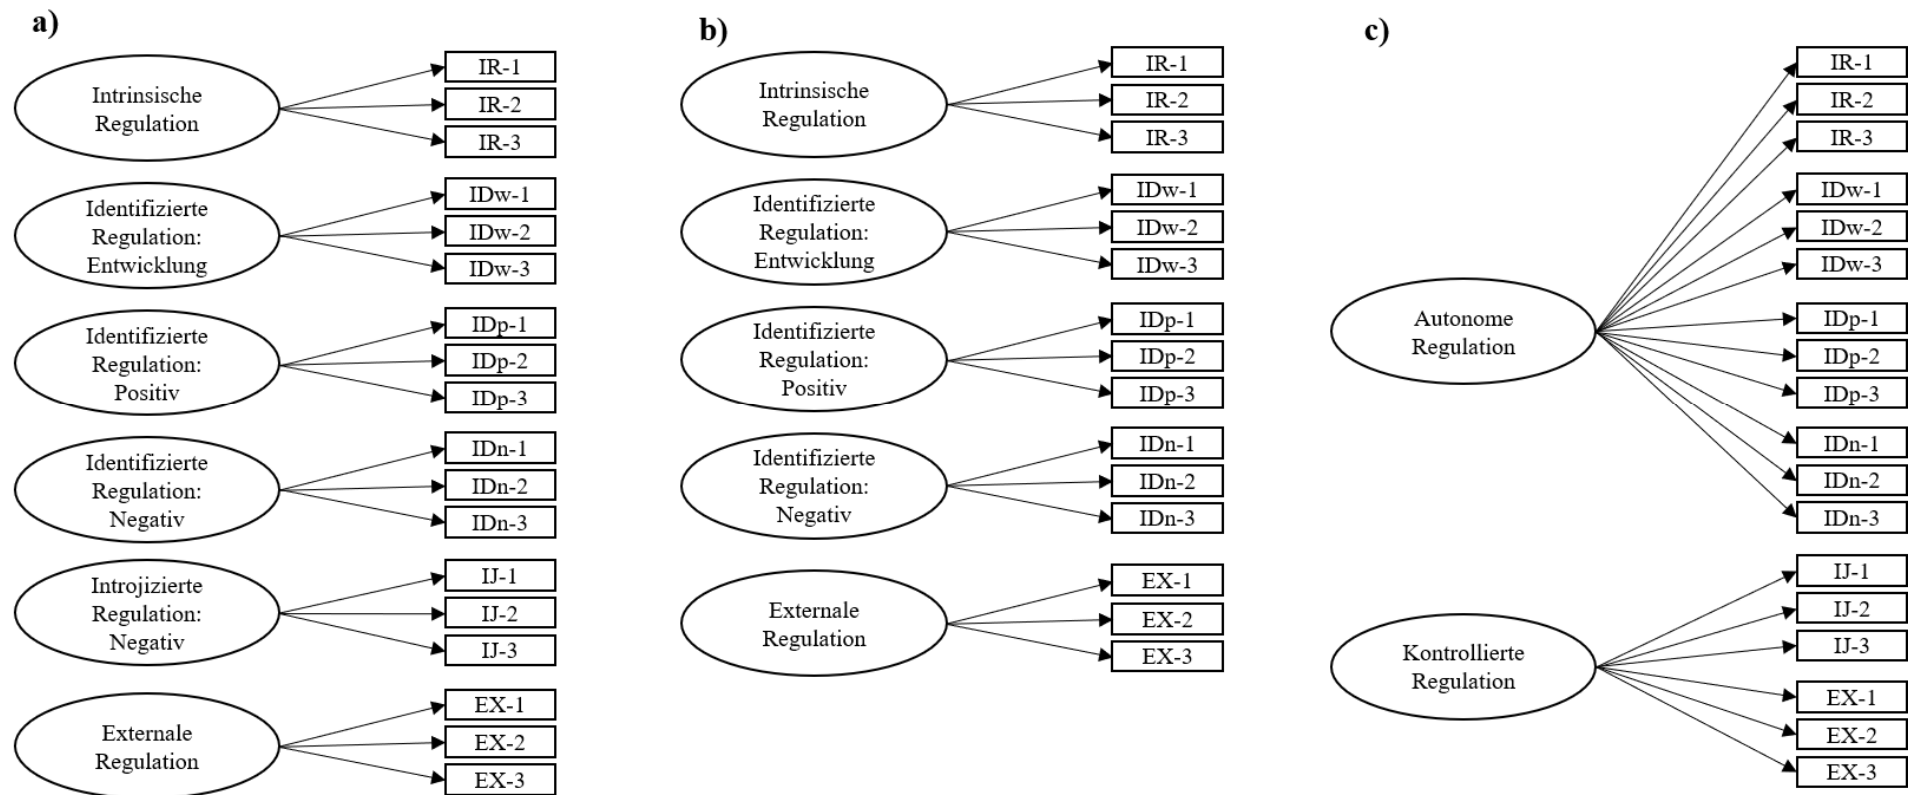

*Anmerkung:* IR = Intrinsische Regulation; IDw = Identifizierte Regulation: Weiterentwicklung; IDp = Identifizierte Regulation: Ausdruck von positivem Affekt; IDn: Identifizierte Regulation: Ausdruck von negativem Affekt; IJ: Introjierte Regulation: Negativ; EX = Externale Regulation.

**Tabelle E2.** Erhebungszeitraum und soziodemographische Variablen der fünf Stichproben.

| Stichprobe            | Erhebungszeitraum | N     | Mittleres<br>Fachsemester (SD) | Geschlecht |          |        |
|-----------------------|-------------------|-------|--------------------------------|------------|----------|--------|
|                       |                   |       |                                | männlich   | weiblich | divers |
| <i>N<sub>1a</sub></i> | Mai – Juli 2021   | 629   | 6.22 (3.68)                    | 21.6 %     | 78.2 %   | 0.2 %  |
| <i>N<sub>1b</sub></i> | Mai – Juli 2021   | 629   | 6.00 (3.55)                    | 24.0 %     | 75.2 %   | 0.8 %  |
| <i>N<sub>1c</sub></i> | Mai – Juli 2021   | 629   | 6.10 (3.68)                    | 25.4 %     | 74.5 %   | 0.2 %  |
| <i>N<sub>2a</sub></i> | Okt. – Dez. 2021  | 743   | 5.01 (2.44)                    | 33.5 %     | 65.1 %   | 1.4 %  |
| <i>N<sub>2b</sub></i> | Apr. – Juli 2022  | 1,089 | 4.87 (2.26)                    | 27.5 %     | 71.5 %   | 1.0 %  |

**Tabelle E3.** Vergleich der Modellgüte für vier Modelle mit *N<sub>1c</sub>* aus Studie 1

| Modell           | df  | AIC    | BIC    | $\chi^2$ | CFI | TLI | RMSEA | $\Delta\chi^2$ ( $\Delta df$ ) <sup>1</sup> | p     |
|------------------|-----|--------|--------|----------|-----|-----|-------|---------------------------------------------|-------|
| 1-Faktormodell   | 135 | 35,143 | 35,303 | 5,023.75 | .20 | .09 | .24   | 2,531.0 (1)                                 | <.001 |
| 2-Faktorenmodell | 134 | 32,614 | 32,779 | 2,492.76 | .61 | .56 | .17   | 2,177.5 (14)                                | <.001 |
| 6-Faktorenmodell | 120 | 30,465 | 30,691 | 315.21   | .97 | .96 | .05   | 76.5 (40)                                   | <.001 |
| 5-Faktorenmodell | 80  | 24,318 | 24,495 | 238.68   | .97 | .97 | .06   |                                             |       |

Anmerkung: <sup>1</sup> Satorra-Bentler Chi-Quadrat Unterschiedstest.

**Tabelle E4.** Anzahl Teilnehmende und Geschlecht je Studiengang der Stichprobe *N<sub>2a</sub>* = 734 in Studie 2

| (Teil-)Studiengang und Abschlussgrad                    | N   | weiblich | männlich | divers |
|---------------------------------------------------------|-----|----------|----------|--------|
| <i>Lebenswissenschaften</i>                             |     |          |          |        |
| Zahnmedizin StEx                                        | 106 | 71.7 %   | 28.3 %   |        |
| Neurowissenschaften B.Sc. (1-Fach)                      | 15  | 60.0 %   | 40.0 %   |        |
| Rehabilitationswissenschaften M.A. (1-Fach)             | 106 | 96.2 %   | 1.9 %    | 1.9 %  |
| Prävention u. Intervention in d. Kindheit M.A. (1-Fach) | 25  | 100.0 %  |          |        |
| <i>Geographie und Geowissenschaften</i>                 |     |          |          |        |
| Geographie B.A. (1-Fach)                                |     |          |          |        |
| Geographie B.A. (2-Fach)                                | 12  | 58.3 %   | 33.3 %   | 8.3 %  |
| Geographie M.A. (1-Fach) und M.A. (2-Fach)              | 59  | 50.8 %   | 49.2 %   |        |
| Geographie B.A. Lehramtsprofil GyGes und HRSG           | 82  | 67.1 %   | 32.9 %   |        |
| Geographie M.Ed. Lehramtsprofil GyGes und HRSG          | 44  | 63.6 %   | 36.4 %   |        |
| Geowissenschaften B.Sc. (1-Fach) und M.Sc. (1-Fach)     | 48  | 43.8 %   | 56.3 %   |        |
| <i>Ostasienwissenschaften</i>                           |     |          |          |        |
| Chinastudien B.A. (2-Fach) und M.A. (1-Fach)            | 15  | 60.0 %   | 33.0 %   | 7.0 %  |
| Japanisch B.A. und M.Ed. Lehramtsprofil GyGes           | 7   | 42.9 %   | 57.1 %   |        |
| Japanische Kultur B.A. (2-Fach) und M.A. (2-Fach)       | 33  | 54.5 %   | 33.3 %   | 12.1 % |
| <i>Linguistik und Informationsverarbeitung</i>          |     |          |          |        |
| Informationsverarbeitung M.A. (1-Fach)                  | 16  | 75.0 %   | 25.0 %   |        |
| Informationsverarbeitung B.A. (2-Fach)                  | 20  | 70.0 %   | 30.0 %   |        |
| Linguistik B.A. (2-Fach) und M.A. (1-Fach)              | 51  | 74.5 %   | 21.6 %   | 3.9 %  |
| <i>Keine Angabe zu Studiengang und/oder Geschlecht</i>  | 31  |          |          |        |

**Tabelle E5.** Anzahl Teilnehmende und Geschlecht je Studiengang der Stichprobe  $N_{2b} = 1,089$  in Studie 2

| (Teil-)Studiengang und Abschlussgrad                       | <i>N</i> | weiblich | männlich | divers |
|------------------------------------------------------------|----------|----------|----------|--------|
| <i>Anglistik</i>                                           |          |          |          |        |
| Englisch B.A. Lehramtsprofile Grundschule und SoPäd        | 70       | 94.3 %   | 4.3 %    | 1.4 %  |
| Englisch M.Ed. Lehramtsprofile Grundschule und SoPäd       | 18       | 100.0 %  |          |        |
| Englisch B.A. Lehramtsprofil HRSG                          | 34       | 73.5 %   | 26.5 %   |        |
| Englisch M.Ed. Lehramtsprofil HRSG                         | 15       | 60.0 %   | 40.0 %   |        |
| Englisch B.A. Lehramtsprofile GyGe und BK                  | 66       | 84.8 %   | 15.2 %   |        |
| Englisch M.Ed. Lehramtsprofile GyGe und BK                 | 54       | 70.4 %   | 29.6 %   |        |
| English Studies B.A. (2-Fach)                              | 55       | 85.5 %   | 14.5 %   |        |
| English Studies M.A. (1-Fach und 2-Fach)                   | 22       | 72.7 %   | 22.7 %   | 4.5 %  |
| <i>Romanistik</i>                                          |          |          |          |        |
| Italienisch B.A. (2-Fach)                                  | 11       | 90.9 %   | 9.1 %    |        |
| Italienisch B.A. und M.Ed. Lehramtsprofil GyGe             | 16       | 87.5 %   | 12.5 %   |        |
| Spanisch B.A. (2-Fach)                                     | 7        | 100.0 %  |          |        |
| Spanisch B.A. und M.Ed. Lehramtsprofile GyGe und HRSG      | 95       | 72.6 %   | 27.4 %   |        |
| Französisch B.A. (2-Fach)                                  | 10       | 90.0 %   | 10.0 %   |        |
| Französisch B.A. Lehramtsprofile GyGe und HRSG             | 60       | 85.5 %   | 15.0 %   |        |
| Französisch M.Ed. Lehramtsprofile GyGe und HRSG            | 32       | 81.3 %   | 18.8 %   |        |
| Portugiesisch B.A. (2-Fach)                                | 8        | 87.5 %   | 12.5 %   |        |
| Romanistik M.A. und Komparatistik M.A. (1-Fach und 2-Fach) | 27       | 92.6 %   | 7.4 %    |        |
| <i>Ethnologie</i>                                          |          |          |          |        |
| Ethnologie B.A. (1-Fach)                                   | 60       | 75.0 %   | 21.7 %   | 3.3 %  |
| Ethnologie M.A. (1-Fach und 2-Fach)                        | 23       | 73.9 %   | 26.1 %   |        |
| Sprachen und Kulturen der Islamischen Welt B.A.            | 25       | 72.0 %   | 28.0 %   |        |
| Sprachen und Kulturen Afrikas B.A.                         | 11       | 72.7 %   | 27.3 %   |        |
| <i>Slavistik</i>                                           |          |          |          |        |
| Slavistik B.A. (2-Fach)                                    | 7        | 71.4 %   | 28.6 %   |        |
| Russisch B.A. Lehramtsprofil GyGe                          | 7        | 100.0 %  |          |        |
| <i>Physik</i>                                              |          |          |          |        |
| Physik B.A. Lehramtsprofile GyGe und BK                    | 32       | 31.3 %   | 68.8 %   |        |
| Physik M.Ed. Lehramtsprofile GyGe und BK                   | 13       | 7.7 %    | 84.6 %   | 7.7 %  |
| Physik B.A. Lehramtsprofile HRSG und SoPäd                 | 41       | 41.5 %   | 56.1 %   | 2.4 %  |
| Physik M.Ed. Lehramtsprofile HRSG und SoPäd                | 7        | 71.4 %   | 28.6 %   |        |
| Physik B.Sc.                                               | 94       | 35.1 %   | 62.8 %   | 2.1 %  |
| <i>Sonstige</i>                                            |          |          |          |        |
| Niederländisch B.A. Lehramtsprofile GyGe und HRSG          | 20       | 80.0 %   | 20.0 %   |        |
| Niederländisch M.Ed. Lehramtsprofile GyGe und HRSG         | 10       | 60.0 %   | 40.0 %   |        |
| Versorgungswissenschaften M.Sc.                            | 30       | 80.0 %   | 20.0 %   |        |
| Musik B.A. Lehramtsprofil GyGe                             | 31       | 58.1 %   | 41.9 %   |        |
| Musik M.Ed. Lehramtsprofil GyGe                            | 17       | 64.7 %   | 35.3 %   |        |
| Geophysik und Meteorologie B.Sc.                           | 14       | 71.4 %   | 28.6 %   |        |
| Skandinavistik und Fennistik B.A. (2-Fach)                 | 36       | 72.2 %   | 19.4 %   | 8.3 %  |
| Skandinavistik und Fennistik M.S. (1-Fach und 2-Fach)      | 5        | 100.0 %  |          |        |
| <i>Keine Angabe zu Studiengang und/oder Geschlecht</i>     | 6        |          |          |        |

**Tabelle E6.** Statistiken zur Beurteilung der Messinvarianz

| Modell                | <i>df</i> | $\chi^2$ | CFI | TLI | RMSEA | $\Delta$ CFI | $\Delta$ RMSEA |
|-----------------------|-----------|----------|-----|-----|-------|--------------|----------------|
| <i>Geschlecht</i>     |           |          |     |     |       |              |                |
| Konfigurale Invarianz | 160       | 403.28   | .96 | .95 | .066  |              |                |
| Schwache Invarianz    | 170       | 419.80   | .96 | .95 | .065  | .00          | -.001          |
| Starke Invarianz      | 180       | 428.13   | .96 | .95 | .063  | .00          | -.002          |
| <i>Fakultät</i>       |           |          |     |     |       |              |                |
| Konfigurale Invarianz | 320       | 606.23   | .96 | .94 | .070  |              |                |
| Schwache Invarianz    | 350       | 653.09   | .96 | .95 | .069  | .00          | -.001          |
| Starke Invarianz      | 380       | 739.20   | .95 | .94 | .072  | -.01         | .003           |
| <i>Abschluss</i>      |           |          |     |     |       |              |                |
| Konfigurale Invarianz | 400       | 693.01   | .96 | .94 | .071  |              |                |
| Schwache Invarianz    | 440       | 744.15   | .96 | .95 | .069  | .00          | -.002          |
| Starke Invarianz      | 480       | 848.94   | .95 | .94 | .072  | -.01         | .003           |

**Tabelle E7.** Korrelationen der Subskalen zur motivationalen Regulation bei der Befragungsteilnahme mit Drittvariablen

| Drittvariablen                         | IR    | IDw   | IDp   | IDn  | EX    |
|----------------------------------------|-------|-------|-------|------|-------|
| Interesse an Studiengangsgestaltung    | .29*  | .42*  | .30*  | .19* | -.10* |
| Internale politische Selbstwirksamkeit | .16*  | .29*  | .27*  | .07  | .00   |
| Politische Deprivation                 | -.10* | -.23* | -.23* | .25* | -.03  |

*Anmerkungen:* IR = Intrinsische Regulation; IDw = Identifizierte Regulation:

Weiterentwicklung; IDp = Identifizierte Regulation: Ausdruck von positivem Affekt; IDn = Identifizierte Regulation: Ausdruck von negativem Affekt; EX = Externale Regulation;

\*  $p < .05$ .

**Tabelle E8.** Maße zur Beurteilung der Modellgüte der latenten Profilanalysen

| Modelle   | AIC    | BIC    | Entropie | $p_{min}$ | $p_{max}$ |
|-----------|--------|--------|----------|-----------|-----------|
| 2 Profile | 53,525 | 53,625 | .58      | .72       | .93       |
| 3 Profile | 53,254 | 53,391 | .63      | .66       | .89       |
| 4 Profile | 52,263 | 52,437 | .73      | .70       | .95       |
| 5 Profile | 51,870 | 52,081 | .73      | .66       | .88       |
| 6 Profile | 51,873 | 52,084 | .72      | .67       | .88       |

**Tabelle E9.** Deskriptive Statistiken für die vier Validierungsvariablen je Profil und Ergebnisse der Gruppenvergleiche.

| Validierungsvariablen     | Glücksritter<br>(N = 280)<br>M (SD) | Unzufriedene<br>(N = 593)<br>M (SD) | Genügsame<br>(N = 1,295)<br>M (SD) | Hoch-Motivierte<br>(N = 1,539)<br>M (SD) | Teststatistik <sup>a</sup><br>X <sup>2</sup> |
|---------------------------|-------------------------------------|-------------------------------------|------------------------------------|------------------------------------------|----------------------------------------------|
| Studienzufriedenheit      | 3.43 (0.97)                         | 2.61 (0.95)                         | 3.94 (0.80)                        | 3.32 (0.95)                              | 782.74*                                      |
| Fehlende Antworten in %   | 4.04 (7.68)                         | 2.70 (4.58)                         | 3.09 (5.37)                        | 2.16 (3.86)                              | 25.26*                                       |
| Länge positiver Antworten | 34.82 (90.30)                       | 63.38 (100.65)                      | 53.64 (89.16)                      | 78.12 (119.90)                           | 91.48*                                       |
| Länge negativer Antworten | 81.47 (217.35)                      | 225.70 (325.23)                     | 80.02 (147.05)                     | 191.57 (297.23)                          | 300.40*                                      |

*Anmerkungen:* <sup>a</sup> für alle Vergleiche wurden Kruskal-Wallis-Tests berechnet.

\*  $p < .05$

**Tabelle E10.** Mittlere Differenzen ( $M_{diff}$ ) und Ergebnisse der post-hoc Vergleiche zwischen Profilen.

| Profile         | Studien-<br>zufriedenheit<br>$M_{diff}$ | Fehlende<br>Werte in %<br>$M_{diff}$ | Länge positiver<br>Antworten<br>$M_{diff}$ | Länge negativer<br>Antworten<br>$M_{diff}$ |
|-----------------|-----------------------------------------|--------------------------------------|--------------------------------------------|--------------------------------------------|
| Glücksritter    |                                         |                                      |                                            |                                            |
| Unzufriedene    | 0.83*                                   | 1.33*                                | -28.55*                                    | -144.23*                                   |
| Genügsame       | -0.50*                                  | 0.95*                                | -18.81*                                    | 1.46                                       |
| Hoch-Motivierte | 0.12*                                   | 1.88*                                | -43.30*                                    | -110.10*                                   |
| Unzufriedene    |                                         |                                      |                                            |                                            |
| Genügsame       | -1.33*                                  | -0.38                                | 9.74*                                      | 145.68*                                    |
| Hoch-Motivierte | -0.71*                                  | 0.55*                                | -14.75*                                    | 34.13                                      |
| Genügsame       |                                         |                                      |                                            |                                            |
| Hoch-Motivierte | 0.62*                                   | 0.93*                                | -24.49*                                    | -111.55*                                   |

*Anmerkung:* \*  $p < .05$
